# Supplementary material
Source: HighWire-hosted journal article supplement (http://www.annfammed.org/highwire/filestream/7781/field_highwire_adjunct_files/0/Crosson_Appendix.pdf)
Supplement: Crosson_Appendix.pdf [file Crosson_Appendix.pdf]

Online Supplementary Material

Crosson JC, Stroebel C, Scott JG, Stello B, Crabtree BF. Implementing an electronic medical record in a family medicine practice: communication, decision making, and conflict. *Ann Fam Med.* 2005;3:307-311.

<http://www.annfammed.org/cgi/content/full/3/4/307/DC1>

**Supplemental Appendix. Data Coding Scheme**

**Coding template**

- |                                        |                                                                                                                                                                                                                                  |
|----------------------------------------|----------------------------------------------------------------------------------------------------------------------------------------------------------------------------------------------------------------------------------|
| 1. Electronic medical record (EMR) use | Descriptions of the use and functionality of the EMR                                                                                                                                                                             |
| 2. EMR implementation                  | Information about the transition from paper charts to the EMR                                                                                                                                                                    |
| 3. Communication                       | Communication among practice members                                                                                                                                                                                             |
| 4. Decision making                     | Formal and informal decision-making processes, including examples of decisions made by practice leaders and other staff members. Formal and informal exercise of power by practice leaders, supervisors, and other staff members |
| 5. Conflict                            | Interpersonal conflicts among practice members                                                                                                                                                                                   |

**Emerging themes**

- |                        |                                                                                                                                |
|------------------------|--------------------------------------------------------------------------------------------------------------------------------|
| 6. Financial pressures | Descriptions of financial difficulties faced by the practice—including practice physicians foregoing salary for several months |
| 7. Scheduling program  | Descriptions of the scheduling program, comparisons with the previous system, problems reported by staff and patients          |

**Other coding**

- |                   |                                                                                                                                                                                                                                                                                                                            |
|-------------------|----------------------------------------------------------------------------------------------------------------------------------------------------------------------------------------------------------------------------------------------------------------------------------------------------------------------------|
| 8. EMR References | We searched all data for the terms “EMR” or “electronic medical record” using the NVivo search engine and expanded all finds to include the enclosing paragraph. We then coded this found set using the term “EMR references.” This ensured we included all data regarding the EMR not captured using the coding template. |
| 9. Training       | We searched all data for permutations of the term “training” using the NVivo search engine and expanded all finds to include the enclosing paragraph. We then coded this found set using the term “training.”                                                                                                              |
